# Supplementary material for: DINO: A Diabatic Model of Pole-to-Pole Ocean Dynamics to Assess Subgrid Parameterizations across Horizontal Scales
Source: Copernicus journal article supplement (doi:10.5194/egusphere-2025-1100), 2025-03-20
Supplement: Supplementary file [file egusphere-2025-1100-AC1-supplement.pdf]

## Reply to Referee comment #1:

The authors would like to thank the referee for their time, as well as their invaluable comments and suggestions. In the following each comment, suggestion or concern is replied in **purple font**. Specific revisions of the text are in quotes, with the respective changes highlighted in bold.

---

## Summary and recommendation

This manuscript proposes a modeling hierarchy, DINO, intended to act as a testbed for eddy parameterizations. The new hierarchy extends NeverWorld2, a previous such testbed, by including both temperature and salinity, an (idealized) nonlinear equation of state, an inter hemispheric overturning circulation, and diabatic processes. All of these either influence or are influenced by mesoscale eddies, so DINO would provide a more stringent and comprehensive test of eddy parameterizations. The ocean modeling community is in desperate need of such standardized testbeds and DINO stands to be a very useful contribution. The manuscript is generally well-written and the hierarchy carefully documented, with a few exceptions detailed under my specific comments. The comments primarily ask for clarification, although I do have concerns about the design of the freshwater forcing and the shortness of the period analyzed. I support publication if the authors can address these comments and concerns.

## Specific comments

1. Two of the design decisions seem unusual or arbitrary. While they are unlikely to impact the ability of DINO to serve as a testbed for parameterizations, they deserve a few lines of additional justification
  1. The reentrant part of the domain spans  $20^\circ$ . This is significantly wider than the width of Drake Passage, which is about  $8^\circ$  wide. What is the rationale for choosing this width? To match NeverWorld2?

In this we follow previous studies using sector models: NeverWorld2 (Marques et al 2022), Munday et al. 2013. Also, we note that the width of the southern ocean away from Drake passage is wider than  $20^\circ$  in latitude, so we do not see a need to revisit this choice.

2. Why is a minimum depth 2000 m? Neverworld2 has a minimum depth of 200 m, which is a reasonable (if deep) value for continental shelves. In nature, the upper part of the North Atlantic deep western boundary current (associated with Labrador Sea Water) is found around 1000 m depth (Bower and Hunt 2000) and the interactions of the DWBC with the slope are thought to impact the Gulf Stream (Zhang and Vallis 2007). It would thus seem desirable to have the DWBC flow along the sloping topography rather than against the free-slip wall. However, Figure 5 shows that most of the southward flow of the mid-depth overturning cell is found at densities of  $27 \text{ kg m}^{-3}$  or lighter, which figure 6 shows is shallower than 2000 m.

We agree with the comment. DINO was initially configured with a hybrid vertical coordinate, employing z-coordinates for the upper 1000 m and terrain-following coordinates below. We found that the terrain-following coordinates improve the Western Boundary Current structure and the Gulf Stream separation, while the z-coordinates near the surface prevent large errors in the pressure gradient term. The latter is especially important at the equator, where the pressure gradient is not balanced by the Coriolis effect. In order for the sigma-coordinates to smoothly transition to flat coordinates, we need the bathymetry to stay well below 1000 m, hence we chose 2000 m. As the parameterizations we are currently testing are developed for z-level coordinates only, the paper therefore shows results from DINO configuration with z-levels as well. Ultimately, we want DINO to be used by ocean model developers in any vertical coordinates, hence we did not revisit the bathymetry. It should also be noted that a shelf similar to NW2 would be difficult to represent in a coarse  $1^\circ$  model. We have inserted a short paragraph of justification for the bathymetry in Appendix A, summarizing the above.

2. It should be clarified that the equation of state (equation 6) is not an approximation to the *in situ* density, but the potential density (apparently referenced to the surface). The *in situ* density has a pressure dependence that leads to a nearly linear increase in density of about  $4.5 \text{ kg m}^{-3}$  per km of depth. This, if the density at the surface is about  $1026 \text{ kg m}^{-3}$ , the density at 2000 m should be about  $1035 \text{ kg m}^{-3}$ . The potential density referenced to 2000 m (used in figures 5 and 6) should therefore be in the 30s rather than the 20s. It might be simpler to use potential density referenced to the surface in these figures—the numerical values are unlikely to change much, but they'd be closer to what people would expect for potential density.

This should indeed be clarified. The S-EOS approximates the *in situ* density minus a reference density profile. This is responsible for the mentioned differences to the potential density values at 2000m one would usually expect. The reason Roquet et al. (2015a and 2015b) could remove this background density profile is that it does not produce any dynamical effect. This is due to the fact that horizontal pressure gradients are dependent on horizontal density gradients only, which themselves are insensitive to the addition or removal of a vertical density profile in the equation of state. We added a clarification of the above where the EOS is first introduced.

3. Lines 112–114: Note that AABW and NADW have essentially the same density at the surface, but AABW is denser than NADW at depth due to the thermobaric effect (Nycander et al. 2015). Since DINO's equation of state supports the thermobaric effect, surface forcing that produces AABW that is denser than NADW at the surface may result in AABW that is excessively dense at depth.

Since DINO does not include sea ice and the idealized bathymetry has no shelf, the concept of AABW in DINO is only a very idealized model equivalent (as for NADW). But we agree with the reviewer and to clarify for the reader, we have rephrased the

mentioned lines: **“To ensure that** water forming at the southern boundary is always denser than the water forming at the northern boundary...”

4. Lines 189–190: It is not clear how starting from rest ensures conservation or what is being conserved.

We agree. We propose the following reformulation:

**“The used interpolation tool only treats scalar fields and cannot ensure to conserve properties of vector fields, such as divergence, or vorticity. Since the velocity fields spin-up rather quickly in DINO, we chose to initialize all experiments from rest, after interpolating only the tracer fields and ssh.”**

5. The approach to freshwater forcing does not seem adequate. Salinity restoring is indeed unrealistic, but five years is unlikely to be sufficient to produce a stable climatology of moisture fluxes and four years is not long enough for the circulation to adjust to the change in the boundary conditions. Since the procedure for producing the freshwater forcing is repeated independently for each model resolution, this leads to each resolution being subjected to different freshwater forcing. This is undesirable for a model hierarchy that is supposed to only differ by resolution and subgrid scale parameterizations. In lieu of devising a new freshwater forcing scheme (which would require expensive recomputations), it would be more straightforward and clarifying to simply forgo freshwater forcing and analyze the cases with salinity restoring.

The initial motivation behind this approach was to avoid damping the tracer variability by restoring to zonally uniform profiles of T and S. But given that in our approach, we force with time-mean EmP climatologies computed from S restoring while T remains forced through restoring, we agree that the advantage vanishes compared to the downsides of having different freshwater forcing across the hierarchy. We analyzed the results with salinity restoring only and it does not change the conclusions. We agree that this is a more straightforward forcing strategy, so we revised the manuscript to report only on simulations with salinity restoring and updated all figures accordingly.

6. Similarly, four years does not seem sufficient to characterize the mean state of higher resolution models.

We agree with the reviewer that the highest resolution configuration did not run long enough to characterize the mean state, hence we only include fast-adjusting variables in our analysis (such as kinetic energy and associated spatial spectra). To make sure that our procedure reads clearly, the higher resolution model ran for respectively 23 years, and we averaged the final 4 years to produce mean variables that are finally analyzed.

As we investigated for comments 5. + 6., we decided to extend our initial simulation of 19 years with salinity restoring up to 30 years. Preliminary tests showed that this would not change the conclusions of the paper, but indeed yields more robust results. Hence the revised manuscript now includes analyses on the last 10 years of 30 years long simulations for the fast adjusting metrics.

7. Page 12: The rationale for the approach to separating the mean and eddy heat fluxes is not clear. A three month average doesn't seem sufficient to separate mesoscale eddy timescales from the mean—why not use an average over the full four years available? Also, considering that resolved eddies still play a role in the R1 simulation, why are the effects of these not also diagnosed and added to the GM contribution?

The suggested approach would absorb seasonality into eddy heat fluxes, which is what we want to avoid. Nevertheless we tested it and did not find that it changes the conclusions regarding the mean meridional heat transport and adopted the suggestion in the revised version. We agree that the effect of resolved eddies for R1, although only relevant at low latitudes, should be included. Hence we revised the diagnostics to include the combined meridional heat fluxes of GM and the resolved eddy contribution for the R1 experiment.

### Technical corrections

1. Remove indent on line following equation (5).

Done.

### References:

- Marques, G. M., Loose, N., Yankovsky, E., Steinberg, J. M., Chang, C. Y., Bhamidipati, N., ... & Zanna, L. (2022). NeverWorld2: An idealized model hierarchy to investigate ocean mesoscale eddies across resolutions. *Geoscientific Model Development*, 15(17), 6567-6579.
- Munday, D. R., Johnson, H. L., & Marshall, D. P. (2013). Eddy saturation of equilibrated circumpolar currents. *Journal of Physical Oceanography*, 43(3), 507-532.
